# Supplementary material
Source: publisher figshare collection journal article supplement (https://acs.figshare.com/ndownloader/files/22644407)
Supplement: Supplementary file 1 [file 22644407]

## Supporting Information

### Tissue Adhesive Paint of Silk Micro-particles for Articular Surface Cartilage

#### Regeneration

Jingwei Zhang<sup>a,b</sup> †, Xianzhu Zhang<sup>a,b</sup> †, Yi Hong<sup>a,b</sup>, Qianbao Fu<sup>a,b</sup>, Qiulin He<sup>a,b</sup>, Asma Mechakra<sup>a,b</sup>, Qiuwen Zhu<sup>a,b</sup>, Feifei Zhou<sup>a,b</sup>, Renjie Liang<sup>a,b</sup>, Chenglin Li<sup>a,b</sup>, Yejun Hu<sup>a,b</sup>, Yiwei Zou<sup>a,b</sup>, Shufang Zhang<sup>a,b,d</sup>, HongWei Ouyang<sup>a,b,c,d\*</sup>

- a. Dr. Li Dak Sum & Yip Yio Chin Center for Stem Cells and Regenerative Medicine, and Department of Orthopedic Surgery of the Second Affiliated Hospital, Zhejiang University School of Medicine, Hangzhou, China.
- b. Zhejiang University-University of Edinburgh Institute, Zhejiang University School of Medicine, and Key Laboratory of Tissue Engineering and Regenerative Medicine of Zhejiang Province, Zhejiang University School of Medicine, Hangzhou, China.
- c. Department of Sports Medicine, Zhejiang University School of Medicine, Hangzhou, China.
- d. China Orthopedic Regenerative Medicine Group (CORMed), Hangzhou, China.

†These authors contributed equally to this work.

Corresponding author. E-mail: [hwoy@zju.edu.cn](mailto:hwoy@zju.edu.cn);

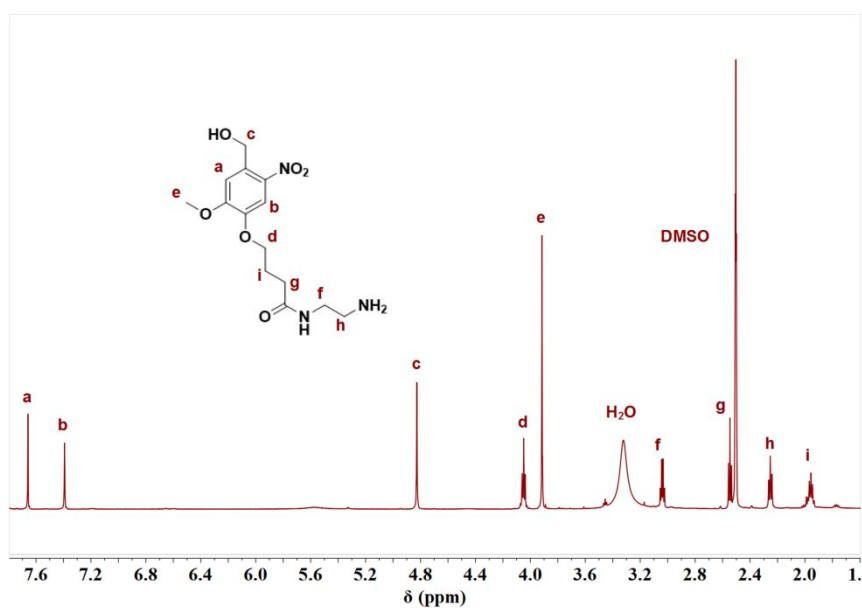

Figure S1. Structure characterization of NB by  $^1\text{H}$  NMR (600MHz)

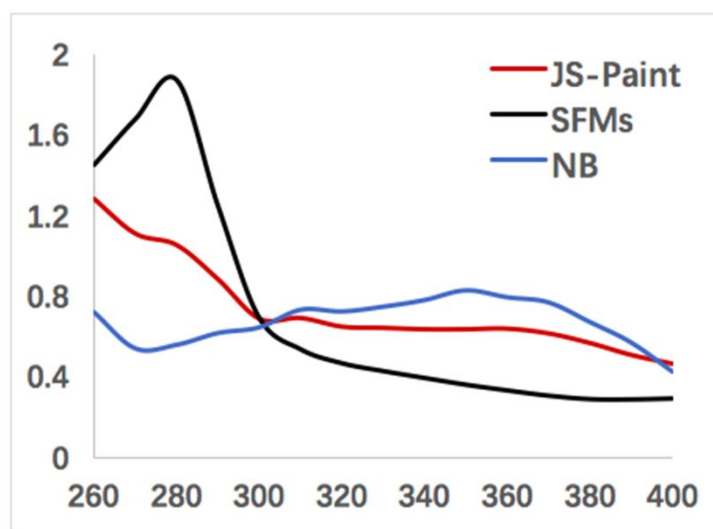

Figure S2. UV-vis spectrum of JS-Paint, SFMs and NB.

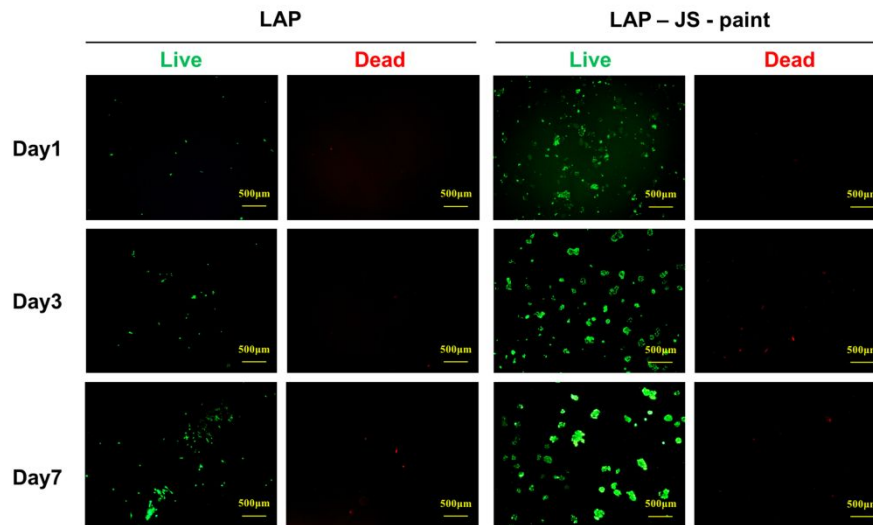

Figure S3 Representative Live/dead staining images of Rabbit MSC cells on LAP and LAP-JS-Paint on day 1, day 3, day 7 (Scale bar: 500  $\mu$ m).

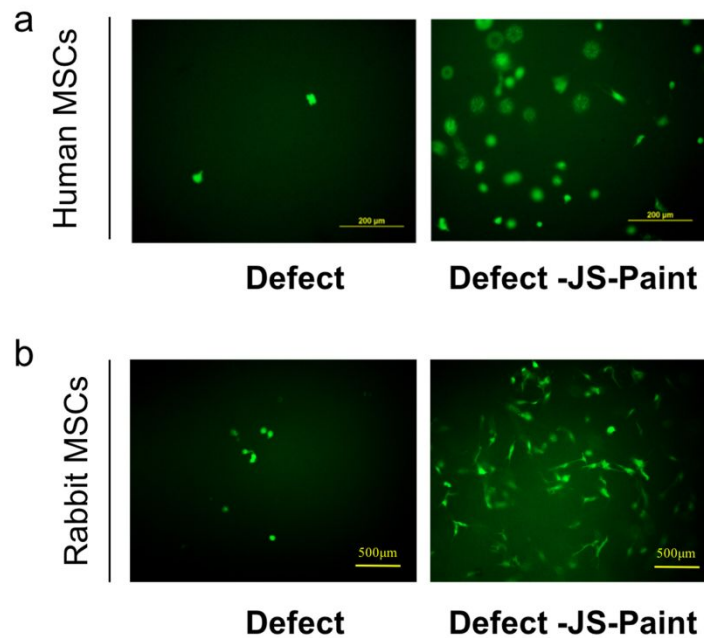

Figure S4 Live staining of (a) Human MSCs and (b) Rabbit MSCs attached on Defect and Defect-JS-Paint 8h after cell seeding.

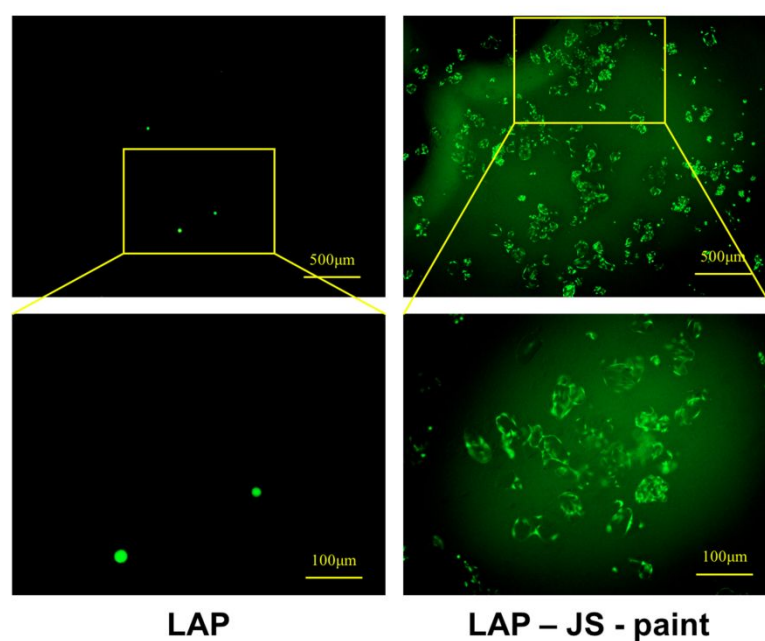

*Figure S5. Live staining of cells showing cells migrated onto the LAP and LAP-JS-Paint on day 5.*

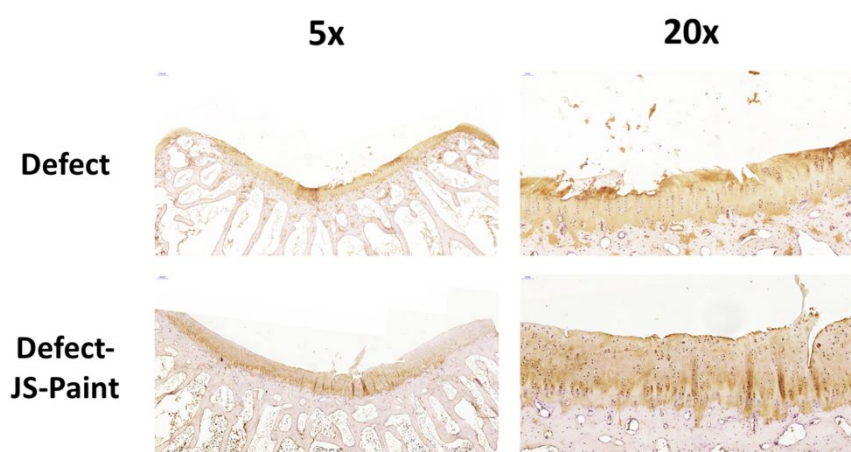

*Figure S6. Immunohistochemistry images of type II collagen in the newly formed cartilage of Defect and Defect-JS-Paint groups.*
